# Supplementary material for: Shared genetics between breast cancer and its predisposing diseases identify novel breast cancer treatment candidates
Source: bioRxiv or medRxiv preprint supplement (doi:10.1101/2024.05.14.24307374), 2024-05-15
Supplement: Supplementary file [file media-2.pdf]

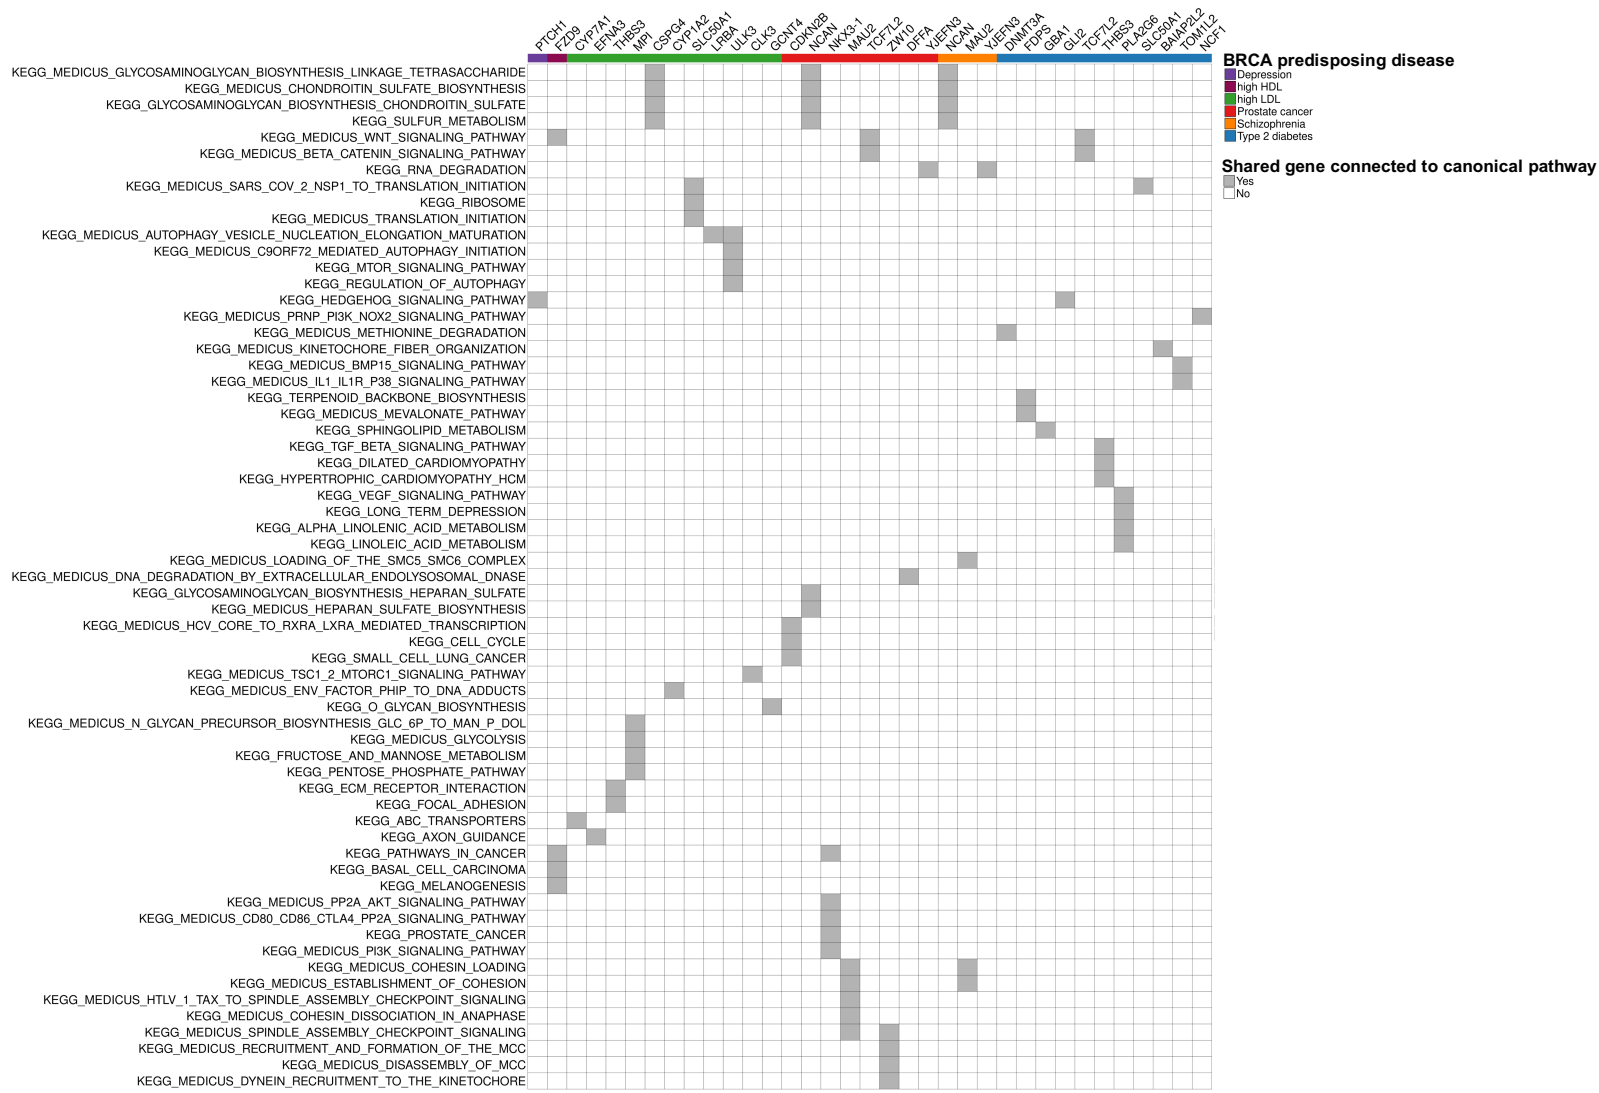

**Supplementary Figure 1.** KEGG canonical pathways connected to the shared genes between breast cancer and its predisposing diseases.
